# Supplementary material for: TiO2 microsphere impregnated alginate: a novel hybrid sorbent for uranium removal from aquatic bodies
Source: Royal Society of Chemistry journal article supplement (doi:10.1039/c9nj06006e), 2020-01-01
Supplement: c9nj06006e1.pdf [file c9nj06006e1.pdf]

## Supplementary material

### TiO<sub>2</sub> microspheres impregnated alginate: A novel hybrid sorbent for uranium removal from aquatic bodies

Hirakendu Basu<sup>1</sup>, Mehzabin Vivek Pimple<sup>1</sup>, Sudeshna Saha<sup>1</sup>, Asha Patel<sup>2</sup>, Chhatravijay Dansena<sup>2</sup>, Rakesh Kumar Singhal<sup>1</sup>

<sup>1</sup> Analytical Chemistry Division  
Bhabha Atomic Research Centre, Trombay, Mumbai -400085, India  
<sup>2</sup> Guru Ghasidas Central University, Bilaspur, India

#### BET surface area determination of TiO<sub>2</sub> microspheres:

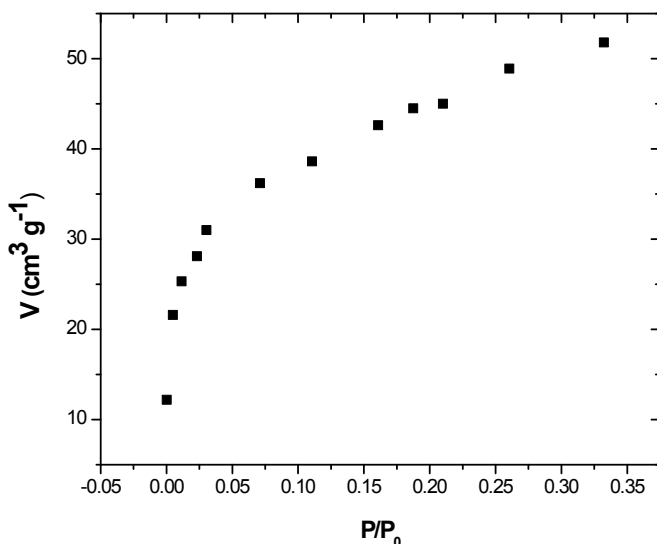

Fig. S1: BET plot of TiO<sub>2</sub> microspheres

#### Composition and stability of the beads

To study the effect of TiO<sub>2</sub> MS loading on calcium alginate for the sorption of U, loading was varied from 1 to 50 wt.% and it was observed that 18% loading of SM in 4% Ca-ALG is optimum. When the loading exceeded 20 %, integrity of the beads was affected and showed a tendency to be brittle.

## Effectiveness of Cal-Alg-TiO<sub>2</sub> MS beads for real water samples

**Table S1: U concentration in the spiked groundwater samples before and after treatment with the beads**

| Sample Id                     | U concentration before treatment  | U concentration after treatment          |
|-------------------------------|-----------------------------------|------------------------------------------|
| Groundwater 1 (Mumbai, India) | 1 µg mL <sup>-1</sup> (spiked)    | Not detected (< 10 ng mL <sup>-1</sup> ) |
| Groundwater 2 (Punjab, India) | 110 ng mL <sup>-1</sup> (natural) | Not detected (< 10 ng mL <sup>-1</sup> ) |

## Monitoring of drinking water quality after treatment with the Cal-Alg-TiO<sub>2</sub> MS beads and

**Table S2: Physicochemical parameters of groundwater samples before and after treatment of groundwater with Cal-Alg-TiO<sub>2</sub> MS beads**

| Parameters                | Before treatment | After treatment |
|---------------------------|------------------|-----------------|
| pH                        | 6-8              | 6-8             |
| Conductance (mS)          | 286-435          | 297-478         |
| Redox potential (mV)      | 96-126           | 101-141         |
| DOC (mg L <sup>-1</sup> ) | 6-10             | 6-11            |
| Ti (µg L <sup>-1</sup> )  | 10-234           | 12-238          |
| Cl (mg L <sup>-1</sup> )  | 14-21            | 12-24           |
| Si (mg L <sup>-1</sup> )  | 26-42            | 25-40           |
| Fe (mg L <sup>-1</sup> )  | 2-5              | 1-5             |
| Ca (mg L <sup>-1</sup> )  | 40-49            | 41-50           |
| Na(mg L <sup>-1</sup> )   | 22-28            | 23-28           |

Note: The range of the concentration values reported have been derived from analysis of five different groundwater samples.

## Comparison of sorption capacities

**Table S3: A comprehensive comparison of the developed material with the earlier reported sorbents for the uranium uptake**

| Adsorbent                         | U adsorbent capacity (mg g <sup>-1</sup> ) | References         | Reference no. |
|-----------------------------------|--------------------------------------------|--------------------|---------------|
| Cal-Alg-TiO <sub>2</sub> MS beads | 31.4                                       | This study         | -             |
| HA-MCNP composite                 | 47.9                                       | Basu et. al.       | 8             |
| GO-Ca-Alginate                    | 29.4                                       | Basu et. al.       | 6             |
| LDO-C                             | 354.2                                      | Yao et. al.        | 56            |
| Titanate nanowire                 | 358                                        | Yin et. al.        | 57            |
| Silica microsphere                | 30                                         | Basu et. al.       | 41            |
| Organosilica-Phosphonate Hybrids  | 54-56                                      | Lebed et. al.      | 58            |
| Silicate RUB-15                   | 152                                        | Chen et. al.       | 59            |
| Carbon nitride composite          | 60.51                                      | Wang et. al.       | 60            |
| Cal-Alg-Chitosan                  | 36.04                                      | Basu et. al.       | 40            |
| Amberlite IRA-402 resin           | 213                                        | Solgy et. al.      | 61            |
| Goethite                          | 66.66                                      | Chegrouche et. al. | 62            |
| Activated carbon                  | 45.24                                      | Morsy et. al.      | 63            |
| Graphene oxide nanosheets         | 299                                        | Li et. al.         | 64            |
